# Supplementary material for: PBN (Phenyl-N-Tert-Butylnitrone)-Derivatives Are Effective in Slowing the Visual Cycle and Rhodopsin Regeneration and in Protecting the Retina from Light-Induced Damage
Source: PubMed Central journal article supplement (PMC4687940; doi:10.1371/journal.pone.0145305), 2015-12-22
Supplement: pone.0145305.s001.pdf [file pone.0145305.s001.pdf]

**Supplement Information: Figure S1**

**Stiles et al. : PBN (phenyl-N-tert-butylnitron)-derivatives are effective in slowing the visual cycle and rhodopsin regeneration and in protecting the retina from light-induced damage.**

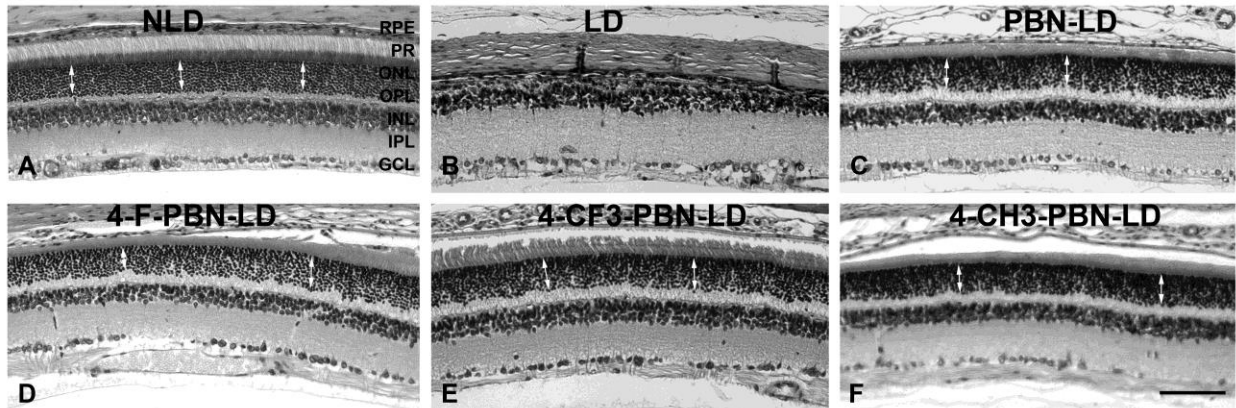

**Fig. S1. Representative images of H&E sections of rat eyes treated with PBNs and light damaged.** After ERG recordings, eyes were enucleated for histology, marked for orientation, and fixed. Five- $\mu\text{m}$  sections were cut along the vertical meridian through the optic nerve and stained with H&E. Representative sections from each treatment were imaged from the superior-central retina, which is specifically affected by exposure to damaging light. A, no light damage control (NLD); B, no treatment light damage control (LD); C, PBN treated before light damage; D, 4-F-PBN treated before light damage; E, 4-CF<sub>3</sub>-PBN treated before light damage; F, 4-CH<sub>3</sub>-PBN treated before light damage. Two-headed arrows showing the thickness of the retinal outer nuclear layer (ONL) that represents the photoreceptor cells. RPE, retinal pigment epithelium; PR, photoreceptors; OPL, outer plexiform layer; INL, inner nuclear layer; IPL, inner plexiform layer; and GCL, ganglion cell layer. The scale bar = 50  $\mu\text{m}$ .
