# Supplementary material for: PBN (Phenyl-N-Tert-Butylnitrone)-Derivatives Are Effective in Slowing the Visual Cycle and Rhodopsin Regeneration and in Protecting the Retina from Light-Induced Damage
Source: PubMed Central journal article supplement (PMC4687940; doi:10.1371/journal.pone.0145305), 2015-12-22
Supplement: pone.0145305.s003.pdf [file pone.0145305.s003.pdf]

### Supplement Information: Table 1

**Stiles et al. : PBN (phenyl-N-tert-butyl nitron)-derivatives are effective in slowing the visual cycle and rhodopsin regeneration and in protecting the retina from light-induced damage.**

| <b>Baboon number and treatment</b> | <b>PBN level in RPE/choroid (ng/mg wet weight)</b> |
|------------------------------------|----------------------------------------------------|
| 1- Vehicle                         | 0 (Avg of 3 samples from one eye)                  |
| 1-PBN                              | 24.2 (Avg of 3 samples from one eye)               |
| 2-Vehicle                          | 0 (Avg of 4 samples from one eye)                  |
| 2-PBN                              | 23.5 (Avg of 4 samples from one eye)               |

**Supplement Table 1. Determination of PBN present in the RPE-choroids of baboon.** Along with the retinal tissues for rhodopsin assay as described in the methods section, pieces of RPE-Choroid tissue were collected for determination of PBN by mass spectrometry. The amount of PBN was determined by MS-MS analysis as described in the supplement figure 2. Concentrations were calculated using XCalibur software (Thermo Scientific). PBN determinations in two baboon eyes clearly show that the compound reached the RPE/choroid complex. These results support our finding in mouse eyes treated with PBN, namely that the drug reaches the RPE-choroids complex and inhibits the enzymatic activity of RPE65.
